# Supplementary material for: Identification of gluten T cell epitopes driving celiac disease
Source: PubMed Central journal article supplement (PMC9876541; doi:10.1126/sciadv.ade5800), 2023-01-25
Supplement: sciadv.ade5800_sm.pdf [file sciadv.ade5800_sm.pdf]

Supplementary Materials for  
**Identification of gluten T cell epitopes driving celiac disease**

Markéta Chlubnová *et al.*

Corresponding author: Markéta Chlubnová, [marketch@medisin.uio.no](mailto:marketch@medisin.uio.no);  
Shiva Dahal-Koirala, [shiva.dahal-koirala@medisin.uio.no](mailto:shiva.dahal-koirala@medisin.uio.no); Ludvig M. Sollid, [l.m.sollid@medisin.uio.no](mailto:l.m.sollid@medisin.uio.no)

*Sci. Adv.* **9**, eade5800 (2023)  
DOI: 10.1126/sciadv.ade5800

**This PDF file includes:**

Figs. S1 and S2  
Tables S1 to S3

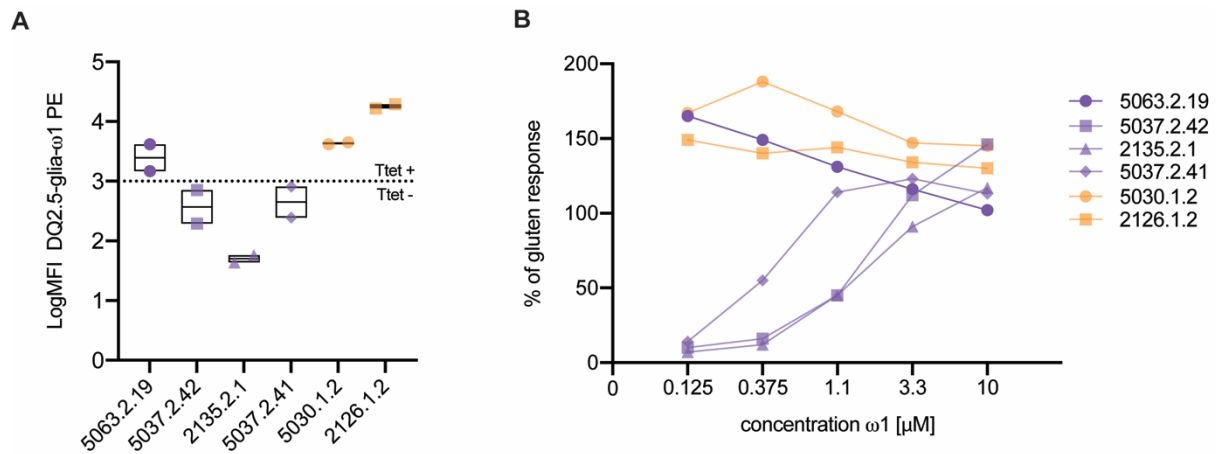

**Figure S1. Correlation between staining intensity and peptide concentration necessary to induce proliferative response of TCCs.** A) We selected five TCCs that were previously reactive to peptide representing DQ2.5-glia- $\omega$ 1 epitope (10 $\mu$ M) in T-cell proliferation assay. We stained these TCCs with PE-labeled HLA-DQ2.5-glia- $\omega$ 1 tetramers and determined LogMFI values for each TCC. TCCs with LogMFI value < 3 were considered tetramer negative (Ttet-), whereas TCCs with LogMFI > 3 were considered tetramer positive (Ttet+). Two data points for each TCC represent two individual experiments. B) We measured a proliferative response of each TCC to titrated (range 0.125 $\mu$ M-10 $\mu$ M) peptide representing DQ2.5-glia- $\omega$ 1 epitope in a T-cell proliferation assay. The results are displayed as proliferative response of each TCC relative to their response to gluten. This experiment was performed twice, and the representative results is displayed here. *Violet coloring represents Ttet- TCCs and orange coloring represents Ttet+ TCCs. All five tested TCCs were expressing the phenotype characteristic of gluten-specific T cells.*

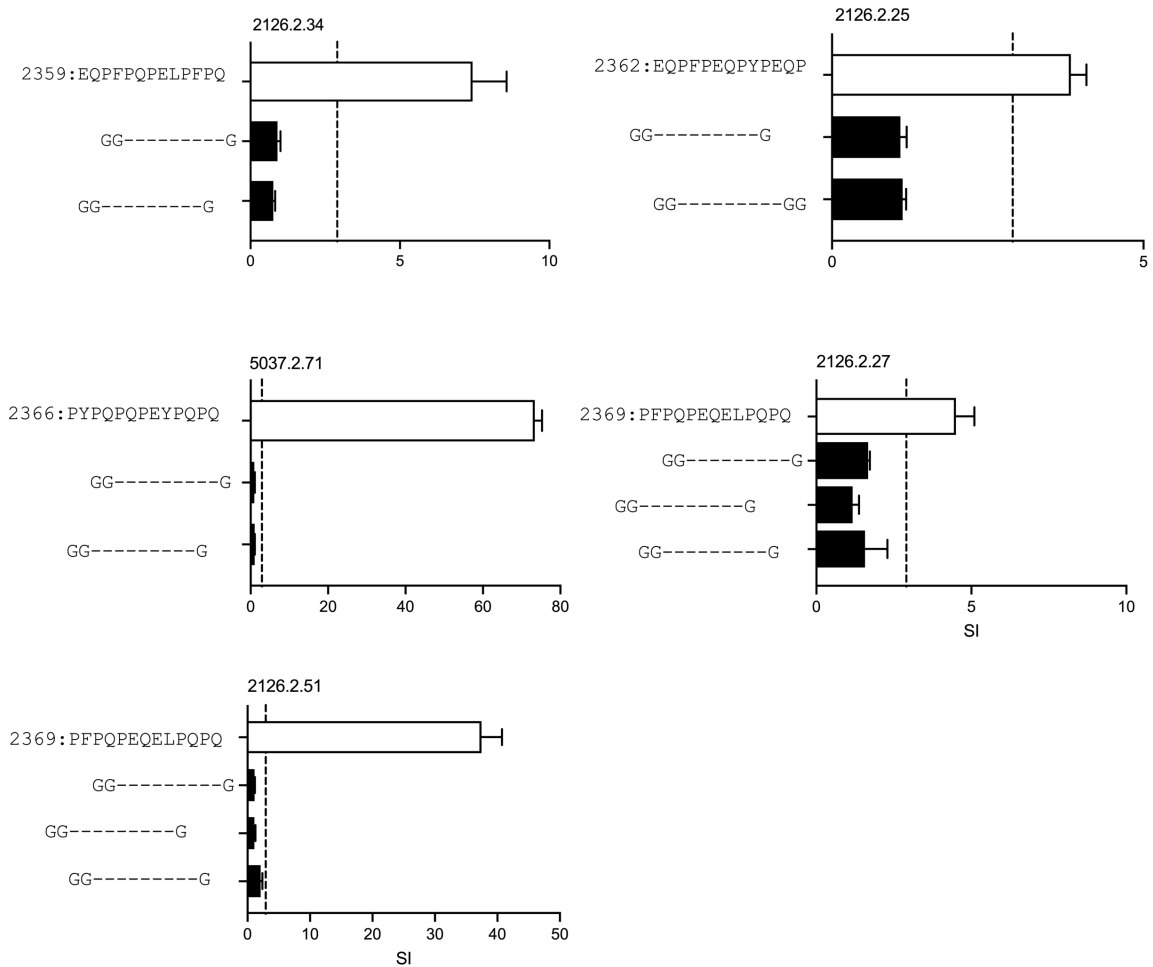

**Figure S2. Reactivity of the remaining five TCCs (from Figure 2).** TCCs with previously defined stimulatory 13-mer peptide sequence were tested against shorter peptides representing respective possible peptide binding register variants flanked with two glycine residues at N-terminus and one glycine residue at the C-terminus in a T-cell proliferation assay. White bars represent original stimulatory 13-mer sequences for each TCC, whereas black bars represent the reactivity to shorter peptides containing only a single possible candidate epitope sequence. TCCs that were not reactive to the corresponding shorter peptides are displayed. Error bars represent standard deviation. All peptides were tested at 10 $\mu$ M concentration in triplicates. The TCCs were considered reactive if SI > 3 (stippled line). Results from one representative experiment of two are shown.

**Table S1. List of tested TCCs.** List of all TCCs used in this study with indication of testing performed for each TCC and its outcome.

**Table S2. Peptide sequences of 20 known unique HLA-DQ2.5 restricted T-cell epitopes in celiac disease.** Column two shows the in house assigned peptide ID. Column three and four enlists the name of the epitope and the respective 9-mer peptide binding register. The last column shows the peptide sequence representing the epitope where the 9-mer core sequence of the epitope is bold faced.

**Table S3. List of peptides generated by strategy 2A and 2B.** Top 100 candidate peptides generated by each strategy.

Table S1

| TCC name  | Grains (n=3) |          | Known epitopes (n=20) |          | Potential novel gluten epitopes (n=18) |          | Shorter peptides (n=11) |          | Comment |
|-----------|--------------|----------|-----------------------|----------|----------------------------------------|----------|-------------------------|----------|---------|
|           | Tested       | Reactive | Tested                | Reactive | Tested                                 | Reactive | Tested                  | Reactive |         |
| 2126.2.12 | yes          | no       | yes                   | no       | no                                     | n/a      | no                      | n/a      | -       |
| 2126.2.13 | yes          | no       | yes                   | no       | no                                     | n/a      | no                      | n/a      | -       |
| 2126.2.14 | yes          | no       | yes                   | no       | no                                     | n/a      | no                      | n/a      | -       |
| 2126.2.16 | yes          | no       | yes                   | no       | no                                     | n/a      | no                      | n/a      | -       |
| 2126.2.17 | yes          | no       | yes                   | no       | no                                     | n/a      | no                      | n/a      | -       |
| 2126.2.18 | yes          | no       | yes                   | no       | no                                     | n/a      | no                      | n/a      | -       |
| 2126.2.19 | yes          | no       | yes                   | no       | no                                     | n/a      | no                      | n/a      | -       |
| 2126.2.2  | yes          | no       | yes                   | no       | no                                     | n/a      | no                      | n/a      | -       |
| 2126.2.20 | yes          | no       | yes                   | no       | no                                     | n/a      | no                      | n/a      | -       |
| 2126.2.21 | yes          | no       | yes                   | no       | no                                     | n/a      | no                      | n/a      | -       |
| 2126.2.23 | yes          | no       | yes                   | no       | no                                     | n/a      | no                      | n/a      | -       |
| 2126.2.24 | yes          | no       | yes                   | no       | no                                     | n/a      | no                      | n/a      | -       |
| 2126.2.30 | yes          | no       | yes                   | no       | no                                     | n/a      | no                      | n/a      | -       |
| 2126.2.32 | yes          | no       | yes                   | no       | no                                     | n/a      | no                      | n/a      | -       |
| 2126.2.33 | yes          | no       | yes                   | no       | no                                     | n/a      | no                      | n/a      | -       |
| 2126.2.35 | yes          | no       | yes                   | no       | no                                     | n/a      | no                      | n/a      | -       |
| 2126.2.36 | yes          | no       | yes                   | no       | no                                     | n/a      | no                      | n/a      | -       |
| 2126.2.37 | yes          | no       | yes                   | no       | no                                     | n/a      | no                      | n/a      | -       |
| 2126.2.38 | yes          | no       | yes                   | no       | no                                     | n/a      | no                      | n/a      | -       |
| 2126.2.4  | yes          | no       | yes                   | no       | no                                     | n/a      | no                      | n/a      | -       |
| 2126.2.40 | yes          | no       | yes                   | no       | no                                     | n/a      | no                      | n/a      | -       |
| 2126.2.41 | yes          | no       | yes                   | no       | no                                     | n/a      | no                      | n/a      | -       |
| 2126.2.42 | yes          | no       | yes                   | no       | no                                     | n/a      | no                      | n/a      | -       |
| 2126.2.43 | yes          | no       | yes                   | no       | no                                     | n/a      | no                      | n/a      | -       |
| 2126.2.45 | yes          | no       | yes                   | no       | no                                     | n/a      | no                      | n/a      | -       |
| 2126.2.46 | yes          | no       | yes                   | no       | no                                     | n/a      | no                      | n/a      | -       |
| 2126.2.47 | yes          | no       | yes                   | no       | no                                     | n/a      | no                      | n/a      | -       |
| 2126.2.5  | yes          | no       | yes                   | no       | no                                     | n/a      | no                      | n/a      | -       |
| 2126.2.50 | yes          | no       | yes                   | no       | no                                     | n/a      | no                      | n/a      | -       |
| 2126.2.52 | yes          | no       | yes                   | no       | no                                     | n/a      | no                      | n/a      | -       |
| 2126.2.53 | yes          | no       | yes                   | no       | no                                     | n/a      | no                      | n/a      | -       |
| 2126.2.6  | yes          | no       | yes                   | no       | no                                     | n/a      | no                      | n/a      | -       |
| 2126.2.7  | yes          | no       | yes                   | no       | no                                     | n/a      | no                      | n/a      | -       |
| 2126.2.8  | yes          | no       | yes                   | no       | no                                     | n/a      | no                      | n/a      | -       |
| 2135.2.18 | yes          | no       | yes                   | no       | no                                     | n/a      | no                      | n/a      | -       |

|           |     |     |     |     |    |     |    |     |   |
|-----------|-----|-----|-----|-----|----|-----|----|-----|---|
| 2135.2.28 | yes | no  | yes | no  | no | n/a | no | n/a | - |
| 2135.2.30 | yes | no  | yes | no  | no | n/a | no | n/a | - |
| 2135.2.32 | yes | no  | yes | no  | no | n/a | no | n/a | - |
| 2135.2.33 | yes | no  | yes | no  | no | n/a | no | n/a | - |
| 2135.2.42 | yes | no  | yes | no  | no | n/a | no | n/a | - |
| 2135.2.5  | yes | no  | yes | no  | no | n/a | no | n/a | - |
| 2135.2.6  | yes | no  | yes | no  | no | n/a | no | n/a | - |
| 2135.2.8  | yes | no  | yes | no  | no | n/a | no | n/a | - |
| 5030.2.2  | yes | no  | yes | no  | no | n/a | no | n/a | - |
| 5037.2.1  | yes | no  | yes | no  | no | n/a | no | n/a | - |
| 5037.2.12 | yes | no  | yes | no  | no | n/a | no | n/a | - |
| 5037.2.13 | yes | no  | yes | no  | no | n/a | no | n/a | - |
| 5037.2.17 | yes | no  | yes | no  | no | n/a | no | n/a | - |
| 5037.2.21 | yes | no  | yes | no  | no | n/a | no | n/a | - |
| 5037.2.25 | yes | no  | yes | no  | no | n/a | no | n/a | - |
| 5037.2.26 | yes | no  | yes | no  | no | n/a | no | n/a | - |
| 5037.2.28 | yes | no  | yes | no  | no | n/a | no | n/a | - |
| 5037.2.29 | yes | no  | yes | no  | no | n/a | no | n/a | - |
| 5037.2.34 | yes | no  | yes | no  | no | n/a | no | n/a | - |
| 5037.2.38 | yes | no  | yes | no  | no | n/a | no | n/a | - |
| 5037.2.4  | yes | no  | yes | no  | no | n/a | no | n/a | - |
| 5037.2.48 | yes | no  | yes | no  | no | n/a | no | n/a | - |
| 5037.2.51 | yes | no  | yes | no  | no | n/a | no | n/a | - |
| 5037.2.58 | yes | no  | yes | no  | no | n/a | no | n/a | - |
| 5037.2.61 | yes | no  | yes | no  | no | n/a | no | n/a | - |
| 5037.2.65 | yes | no  | yes | no  | no | n/a | no | n/a | - |
| 5037.2.67 | yes | no  | yes | no  | no | n/a | no | n/a | - |
| 5037.2.69 | yes | no  | yes | no  | no | n/a | no | n/a | - |
| 5037.2.70 | yes | no  | yes | no  | no | n/a | no | n/a | - |
| 5063.2.1  | yes | no  | yes | no  | no | n/a | no | n/a | - |
| 5063.2.12 | yes | no  | yes | no  | no | n/a | no | n/a | - |
| 5063.2.13 | yes | no  | yes | no  | no | n/a | no | n/a | - |
| 5063.2.15 | yes | no  | yes | no  | no | n/a | no | n/a | - |
| 5063.2.16 | yes | no  | yes | no  | no | n/a | no | n/a | - |
| 5063.2.18 | yes | no  | yes | no  | no | n/a | no | n/a | - |
| 5063.2.2  | yes | no  | yes | no  | no | n/a | no | n/a | - |
| 5063.2.21 | yes | no  | yes | no  | no | n/a | no | n/a | - |
| 5063.2.22 | yes | no  | yes | no  | no | n/a | no | n/a | - |
| 5063.2.32 | yes | no  | yes | no  | no | n/a | no | n/a | - |
| 5063.2.9  | yes | no  | yes | no  | no | n/a | no | n/a | - |
| 2135.2.24 | yes | no  | yes | no  | no | n/a | no | n/a | - |
| 2135.2.1  | yes | yes | yes | yes | no | n/a | no | n/a | - |
| 5037.2.41 | yes | yes | yes | yes | no | n/a | no | n/a | - |
| 5037.2.66 | yes | yes | yes | yes | no | n/a | no | n/a | - |
| 5037.2.14 | yes | yes | yes | yes | no | n/a | no | n/a | - |
| 5037.2.55 | yes | yes | yes | yes | no | n/a | no | n/a | - |
| 5063.2.5  | yes | yes | yes | yes | no | n/a | no | n/a | - |
| 2135.2.13 | yes | yes | yes | yes | no | n/a | no | n/a | - |

|           |     |     |     |     |    |     |    |     |                         |
|-----------|-----|-----|-----|-----|----|-----|----|-----|-------------------------|
| 5037.2.11 | yes | yes | yes | yes | no | n/a | no | n/a | -                       |
| 5037.2.16 | yes | yes | yes | yes | no | n/a | no | n/a | -                       |
| 5037.2.2  | yes | yes | yes | yes | no | n/a | no | n/a | -                       |
| 5037.2.42 | yes | yes | yes | yes | no | n/a | no | n/a | -                       |
| 5037.2.47 | yes | yes | yes | yes | no | n/a | no | n/a | -                       |
| 5037.2.52 | yes | yes | yes | yes | no | n/a | no | n/a | -                       |
| 5037.2.6  | yes | yes | yes | yes | no | n/a | no | n/a | -                       |
| 5063.2.11 | yes | yes | yes | yes | no | n/a | no | n/a | -                       |
| 5063.2.17 | yes | yes | yes | yes | no | n/a | no | n/a | -                       |
| 5063.2.19 | yes | yes | yes | yes | no | n/a | no | n/a | -                       |
| 5063.2.23 | yes | yes | yes | yes | no | n/a | no | n/a | -                       |
| 5063.2.6  | yes | yes | yes | yes | no | n/a | no | n/a | -                       |
| 2126.2.11 | yes | yes | yes | yes | no | n/a | no | n/a | -                       |
| 2126.2.28 | yes | yes | yes | yes | no | n/a | no | n/a | -                       |
| 2126.2.44 | yes | yes | yes | yes | no | n/a | no | n/a | -                       |
| 2126.2.49 | yes | yes | yes | yes | no | n/a | no | n/a | -                       |
| 2126.2.9  | yes | yes | yes | yes | no | n/a | no | n/a | -                       |
| 2135.2.15 | yes | yes | yes | yes | no | n/a | no | n/a | -                       |
| 2135.2.36 | yes | yes | yes | yes | no | n/a | no | n/a | -                       |
| 2135.2.9  | yes | yes | yes | yes | no | n/a | no | n/a | -                       |
| 5030.2.1  | yes | yes | yes | yes | no | n/a | no | n/a | -                       |
| 5030.2.5  | yes | yes | yes | yes | no | n/a | no | n/a | -                       |
| 5037.2.19 | yes | yes | yes | yes | no | n/a | no | n/a | -                       |
| 5037.2.22 | yes | yes | yes | yes | no | n/a | no | n/a | -                       |
| 5037.2.33 | yes | yes | yes | yes | no | n/a | no | n/a | -                       |
| 5037.2.39 | yes | yes | yes | yes | no | n/a | no | n/a | -                       |
| 5037.2.44 | yes | yes | yes | yes | no | n/a | no | n/a | -                       |
| 5037.2.5  | yes | yes | yes | yes | no | n/a | no | n/a | -                       |
| 5037.2.50 | yes | yes | yes | yes | no | n/a | no | n/a | -                       |
| 5037.2.59 | yes | yes | yes | yes | no | n/a | no | n/a | -                       |
| 5037.2.64 | yes | yes | yes | yes | no | n/a | no | n/a | -                       |
| 5037.2.9  | yes | yes | yes | yes | no | n/a | no | n/a | -                       |
| 5063.2.14 | yes | yes | yes | yes | no | n/a | no | n/a | -                       |
| 5063.2.26 | yes | yes | yes | yes | no | n/a | no | n/a | -                       |
| 5063.2.33 | yes | yes | yes | yes | no | n/a | no | n/a | -                       |
| 5030.2.7  | yes | yes | yes | yes | no | n/a | no | n/a | -                       |
| 5037.2.18 | yes | yes | yes | yes | no | n/a | no | n/a | -                       |
| 5037.2.20 | yes | yes | yes | yes | no | n/a | no | n/a | -                       |
| 5037.2.23 | yes | yes | yes | yes | no | n/a | no | n/a | -                       |
| 5037.2.63 | yes | yes | yes | yes | no | n/a | no | n/a | -                       |
| 2126.2.26 | yes | yes | yes | yes | no | n/a | no | n/a | reactive to epitope mix |
| 2126.2.29 | yes | yes | yes | yes | no | n/a | no | n/a | reactive to epitope mix |
| 2126.2.31 | yes | yes | yes | yes | no | n/a | no | n/a | reactive to epitope mix |
| 2126.2.48 | yes | yes | yes | yes | no | n/a | no | n/a | reactive to epitope mix |
| 2135.2.22 | yes | yes | yes | yes | no | n/a | no | n/a | reactive to epitope mix |
| 2135.2.34 | yes | yes | yes | yes | no | n/a | no | n/a | reactive to epitope mix |
| 5037.2.15 | yes | yes | yes | yes | no | n/a | no | n/a | reactive to epitope mix |
| 5037.2.40 | yes | yes | yes | yes | no | n/a | no | n/a | reactive to epitope mix |

|           |     |     |     |    |     |     |     |     |                            |
|-----------|-----|-----|-----|----|-----|-----|-----|-----|----------------------------|
| 2126.2.15 | yes | yes | yes | no | no  | n/a | no  | n/a | lost reactivity to gluten  |
| 2126.2.22 | yes | yes | yes | no | no  | n/a | no  | n/a | lost reactivity to gluten  |
| 2135.2.14 | yes | yes | yes | no | no  | n/a | no  | n/a | lost reactivity to gluten  |
| 5037.2.32 | yes | yes | yes | no | no  | n/a | no  | n/a | lost reactivity to gluten  |
| 5037.2.56 | yes | yes | yes | no | no  | n/a | no  | n/a | lost reactivity to gluten  |
| 5063.2.24 | yes | yes | yes | no | no  | n/a | no  | n/a | lost reactivity to gluten  |
| 5063.2.10 | yes | yes | yes | no | yes | no  | no  | n/a | -                          |
| 2135.2.10 | yes | yes | yes | no | yes | yes | yes | yes | P2361 (P2362, P2366)/2382  |
| 2126.2.1  | yes | yes | yes | no | yes | yes | yes | yes | P2369 (P2371, P2373)/2377  |
| 2126.2.10 | yes | yes | yes | no | yes | no  | no  | n/a | -                          |
| 2126.2.25 | yes | yes | yes | no | yes | yes | yes | no  | P2362 (P2372, P2373)       |
| 2126.2.27 | yes | yes | yes | no | yes | yes | yes | no  | P2369                      |
| 2126.2.34 | yes | yes | yes | no | yes | yes | yes | no  | P2359 (P2368)              |
| 2126.2.39 | yes | yes | yes | no | yes | yes | yes | yes | P2369 (P2371, P2373)/P2377 |
| 2126.2.51 | yes | yes | yes | no | yes | yes | yes | no  | P2369 (P2375)              |
| 2126.2.54 | yes | yes | yes | no | yes | no  | no  | n/a | -                          |
| 2135.2.11 | yes | yes | yes | no | yes | no  | no  | n/a | -                          |
| 2135.2.16 | yes | yes | yes | no | yes | no  | no  | n/a | -                          |
| 2135.2.19 | yes | yes | yes | no | yes | no  | no  | n/a | -                          |
| 2135.2.21 | yes | yes | yes | no | yes | no  | no  | n/a | -                          |
| 2135.2.26 | yes | yes | yes | no | yes | no  | no  | n/a | -                          |
| 2135.2.27 | yes | yes | yes | no | yes | no  | no  | n/a | -                          |
| 2135.2.3  | yes | yes | yes | no | yes | no  | no  | n/a | -                          |
| 2135.2.35 | yes | yes | yes | no | yes | no  | no  | n/a | -                          |
| 2135.2.37 | yes | yes | yes | no | yes | yes | yes | yes | P2366/P2380                |
| 2135.2.38 | yes | yes | yes | no | yes | no  | no  | n/a | -                          |
| 2135.2.4  | yes | yes | yes | no | yes | no  | no  | n/a | -                          |
| 2135.2.44 | yes | yes | yes | no | yes | no  | no  | n/a | -                          |
| 2135.2.45 | yes | yes | yes | no | yes | no  | no  | n/a | -                          |
| 5030.2.4  | yes | yes | yes | no | yes | no  | no  | n/a | -                          |
| 5030.2.6  | yes | yes | yes | no | yes | no  | no  | n/a | -                          |
| 5037.2.24 | yes | yes | yes | no | yes | no  | no  | n/a | -                          |
| 5037.2.3  | yes | yes | yes | no | yes | no  | no  | n/a | -                          |
| 5037.2.30 | yes | yes | yes | no | yes | no  | no  | n/a | -                          |
| 5037.2.31 | yes | yes | yes | no | yes | no  | no  | n/a | -                          |
| 5037.2.35 | yes | yes | yes | no | yes | no  | no  | n/a | -                          |
| 5037.2.36 | yes | yes | yes | no | yes | yes | yes | yes | P2362/P2383                |
| 5037.2.43 | yes | yes | yes | no | yes | no  | no  | n/a | -                          |
| 5037.2.45 | yes | yes | yes | no | yes | no  | no  | n/a | -                          |
| 5037.2.46 | yes | yes | yes | no | yes | no  | no  | n/a | -                          |
| 5037.2.53 | yes | yes | yes | no | yes | no  | no  | n/a | -                          |
| 5037.2.54 | yes | yes | yes | no | yes | no  | no  | n/a | -                          |
| 5037.2.57 | yes | yes | yes | no | yes | no  | no  | n/a | -                          |
| 5037.2.60 | yes | yes | yes | no | yes | no  | no  | n/a | -                          |
| 5037.2.68 | yes | yes | yes | no | yes | no  | no  | n/a | -                          |
| 5037.2.7  | yes | yes | yes | no | yes | no  | no  | n/a | -                          |
| 5037.2.71 | yes | yes | yes | no | yes | yes | yes | no  | P2366 (P2364)              |
| 5063.2.7  | yes | yes | yes | no | yes | no  | no  | n/a | -                          |

---

n/a=not applicable

Peptide ID main stimulatory peptide

(Peptide ID other stimulatory peptides)

/Peptide ID shorter stimulatory peptide



**Table S2**

| Nr | Peptide ID | Epitopes name     | 9-mer peptide binding register | Peptide sequence       |
|----|------------|-------------------|--------------------------------|------------------------|
| 1  | P1314      | glia- $\alpha$ 1b | PYPQPELPY                      | <b>PQLPYPQPELPY</b>    |
| 2  | P2345      | glia- $\alpha$ 3  | FRPEQPYPQ                      | <b>PQFRPEQPYPQPQ</b>   |
| 3  | P1213      | glia- $\gamma$ 1  | PQQSFPQQ                       | <b>PEQPQSFPEQER P</b>  |
| 4  | P1298      | glia- $\gamma$ 2  | IQPEQPAQL                      | <b>GHQPEQPAQL</b>      |
| 5  | P1584      | glia- $\gamma$ 3  | QQPEQPYPQ                      | <b>FPEQPEQPYPEQ</b>    |
| 6  | P1396      | glia- $\gamma$ 4a | SQPEQEFQ                       | <b>FSQPEQEFQ PQ</b>    |
| 7  | P1935      | glia- $\gamma$ 4b | PQPEQEFQ                       | <b>FPQPEQEFQ PQ</b>    |
| 8  | P1653      | glia- $\gamma$ 4c | QQPEQPFQ                       | <b>TEQPEQPFQ P</b>     |
| 9  | P2350      | glia- $\gamma$ 4d | PQPEQFCQ                       | <b>PF PQPEQPFCEQP</b>  |
| 10 | P2351      | glia- $\gamma$ 4e | LQPEQPFQ                       | <b>LQPEQPFPEQP</b>     |
| 11 | P1571      | glia- $\gamma$ 5  | QQPFPEQPQ                      | <b>PEQPFPEQPEQ</b>     |
| 12 | P1269      | glia- $\alpha$ 1a | PFQPELPY                       | <b>QLQPFQPELPY</b>     |
| 13 | P1313      | glia- $\alpha$ 2  | PQPELPYPQ                      | <b>PQPELPYPQPQL</b>    |
| 14 | P2046      | glia- $\omega$ 1  | PFQPEQPF                       | <b>PQQPFQPEQPF</b>     |
| 15 | P2047      | glia- $\omega$ 2  | PQPEQFPW                       | <b>FPQPEQFPWQP</b>     |
| 16 | P2109      | glut-L1           | PFSEQEQPV                      | <b>QQPFSEQEQVLPQ</b>   |
| 17 | P2341      | glut-L2           | FSQQQESPF                      | <b>PPFSEQQESPF SQ</b>  |
| 18 | P2204      | hor-3a            | PIPEQPQPY                      | <b>PEQPIPEQPQPYQQP</b> |
| 19 | P2342      | hor-3b            | PYPEQPQPY                      | <b>PEQPYPEQPQPYQP</b>  |
| 20 | P2343      | sec-3             | PFPEQPEQI                      | <b>PQPFPEQPEQIIPQ</b>  |

Table S3

| Nr | Strategy 2A, n=100 |       | Strategy 2B, n=100 |        |
|----|--------------------|-------|--------------------|--------|
|    | Sequence           | Score | Sequence           | Score  |
| 1  | PQPQPQQPQ          | 1964  | QQPQQPFPQ          | 154536 |
| 2  | PQPQQPFPQ          | 1683  | PQPQLPYPQ          | 89271  |
| 3  | PQPQQQLPQ          | 1543  | PFQPQQPQ           | 15543  |
| 4  | PQPQQPYPQ          | 1500  | PFQPQPYPQ          | 11232  |
| 5  | PFQPQPQQPQ         | 1197  | LQPQQPFPQ          | 7020   |
| 6  | PQPQLPFPQ          | 1146  | QQPQLPFPQ          | 6615   |
| 7  | PQPQLPYPQ          | 981   | PQPQQPYPQ          | 6000   |
| 8  | PFQPQPYPQ          | 936   | PQPQQPFPW          | 5913   |
| 9  | PQPQQPFPW          | 657   | QQPFPQQPQ          | 5143   |
| 10 | PFQPQQPY           | 526   | PQPQLPFPQ          | 4584   |
| 11 | PFQPQQPF           | 506   | QQPQQPYPQ          | 3726   |
| 12 | PQPQQQFPQ          | 430   | PFQPQLPY           | 3540   |
| 13 | PFQPQLPF           | 347   | QFPQPQQPQ          | 2736   |
| 14 | PFQPQLPY           | 292   | PQPQQPFCQ          | 2704   |
| 15 | QQPQQPFPQ          | 274   | PFSQQQQPV          | 2040   |
| 16 | PQPQQQLPQ          | 243   | PQPQQPQQQ          | 1725   |
| 17 | QQPQQPYPQ          | 207   | PQPQQPFPQ          | 1683   |
| 18 | PQPQQPFPL          | 175   | PQPQQQFPQ          | 1632   |
| 19 | PQPQQPFCQ          | 169   | PQPQLPYSQ          | 1512   |
| 20 | IQPQQQQPQ          | 164   | PFQPQQPF           | 1496   |
| 21 | FQPQQPYPQ          | 163   | FRPQQPYPQ          | 1470   |
| 22 | QFPQPQQPQ          | 162   | IQPQQPFPQ          | 1068   |
| 23 | PQQQQPFPQ          | 157   | PFQPQQAAQ          | 912    |
| 24 | PQPQPQQPQ          | 157   | PQQQQPFPQ          | 785    |
| 25 | PFPQQQQPV          | 156   | PQPQQTFPQ          | 775    |
| 26 | QQPQLPFPQ          | 147   | SQQQQPFPQ          | 630    |
| 27 | SQPQQQQPQ          | 147   | PQPQPQQPQ          | 628    |
| 28 | PFPQQQQPL          | 142   | VQPQQQQPQ          | 608    |
| 29 | PQQQQQLPQ          | 137   | FPPQQPYPQ          | 594    |
| 30 | QFPQQQLPQ          | 136   | WQPQQPFPQ          | 360    |
| 31 | PQPQPQYPQ          | 122   | PFPQSQQPQ          | 360    |
| 32 | LQPQQPFPQ          | 108   | PFPQQQQPL          | 336    |
| 33 | PFQPQPQQPQ         | 99    | PQPFPQQP           | 310    |
| 34 | IQPQQPFPQ          | 89    | QQPQQPFQQ          | 300    |
| 35 | LQPQQPYPQ          | 82    | PFPHPQQPQ          | 290    |
| 36 | PQPQQPYSQ          | 75    | QQPQQSFPQ          | 290    |
| 37 | PRPQLPYPQ          | 74    | PQPQPQYPQ          | 280    |
| 38 | PFSQQQQPQ          | 70    | PFPQQQQPI          | 264    |
| 39 | PQPQQQFPQ          | 65    | QQPIQQQPQ          | 264    |
| 40 | PSPQPQQPF          | 62    | NQPQQQQPQ          | 261    |
| 41 | PYPQPQQPF          | 62    | QQQQQPFPQ          | 260    |
| 42 | PQPQQPFSQ          | 60    | QQPQQTFPQ          | 260    |
| 43 | QQPQQPFQQ          | 60    | KQPQQPFPQ          | 252    |
| 44 | PFPHPQQPQ          | 58    | PFSQQQQPS          | 248    |
| 45 | LQPQLPYPQ          | 56    | PQPQPQYSQ          | 248    |
| 46 | NQPQQQQPQ          | 55    | PQQQQQLPQ          | 242    |

|    |            |    |            |     |
|----|------------|----|------------|-----|
| 47 | PFPPPPQQPQ | 52 | QQPQQPFPL  | 242 |
| 48 | PFPPQQQPI  | 51 | QQQQQQQPL  | 237 |
| 49 | PFPPQQQPI  | 48 | QQPQQQLGQ  | 234 |
| 50 | PFPPQQQPP  | 47 | PFPPQLQQPQ | 231 |
| 51 | VQPQQQQPQ  | 46 | HQPQQPYQPQ | 230 |
| 52 | MQPQQPFQPQ | 44 | PFPPQTQQPQ | 228 |
| 53 | PFPPQQQPF  | 44 | QRPQQPFQPQ | 220 |
| 54 | PLPQPQQPQ  | 43 | QQPYPQQPQ  | 220 |
| 55 | PFPPQLQQPQ | 41 | QLPQPQQPQ  | 216 |
| 56 | QQPQQQFPQ  | 40 | QQPQQPFLQ  | 216 |
| 57 | WQPQQPFQPQ | 40 | LGQQPQQQQ  | 197 |
| 58 | PQPQLPYLQ  | 39 | PFSQQQQPQ  | 196 |
| 59 | RQPQQPYQPQ | 39 | QQPFPPQQPY | 195 |
| 60 | PFPPQSQQPQ | 39 | FPQQPQQPF  | 182 |
| 61 | PFPPQTQQPQ | 38 | PQPQQPQQP  | 179 |
| 62 | QQPFPPQQPQ | 37 | PFPPQPQQPY | 175 |
| 63 | PFSQQQQPF  | 37 | PQPQQPFPL  | 175 |
| 64 | PQPQLPYPR  | 37 | PFSQQQQPP  | 175 |
| 65 | HQPQQQLPQ  | 36 | LQPQLPYQPQ | 168 |
| 66 | KQPQQPFQPQ | 36 | SQPQQQSQQ  | 164 |
| 67 | PQPQLPYSQ  | 36 | FQPQQPYQPQ | 163 |
| 68 | PFPPQQPYPR | 36 | PQPQLLYPQ  | 152 |
| 69 | PFPPQPQQPY | 35 | PISQQQQQQ  | 151 |
| 70 | PQPQQQFPQ  | 32 | QFPQTQQPQ  | 144 |
| 71 | QFPQQQFPQ  | 32 | PFLQPQQPF  | 144 |
| 72 | PQPQQIFPQ  | 32 | PQQQLPQPQ  | 135 |
| 73 | PFPPQQQHQ  | 31 | MQPQQPFQPQ | 132 |
| 74 | PYPQPQLPY  | 31 | PQPQQPPQQ  | 130 |
| 75 | PQPQQTFPQ  | 31 | PQPFSQQPQ  | 130 |
| 76 | PFPPQPQLPY | 30 | IQPQQPAQY  | 124 |
| 77 | QQQQQQQPQ  | 29 | PQPQQPFSQ  | 120 |
| 78 | PFPPQQQPL  | 28 | QQPQQQFPQ  | 120 |
| 79 | RQPQQPFQPQ | 28 | QFSQPQQPQ  | 120 |
| 80 | PFPPQQQPV  | 28 | PFRQPQQPF  | 120 |
| 81 | PQPQQQLLQ  | 27 | QQQQQQQPF  | 117 |
| 82 | QFPQQQQPL  | 26 | QQPQQPLPQ  | 117 |
| 83 | QQQQQPFQPQ | 26 | HQPQQQVPQ  | 108 |
| 84 | SQPQQQQPQ  | 26 | RQPQQPFYQ  | 108 |
| 85 | LQPQQQFPQ  | 26 | QQPQQIFPQ  | 104 |
| 86 | PQPQQPQQQ  | 25 | IQSQQQQPQ  | 96  |
| 87 | QQQQQQQLPQ | 24 | FLPQLPYQPQ | 91  |
| 88 | PFPPPQQAAQ | 24 | QFPQQQIPV  | 86  |
| 89 | VFPQPQQPQ  | 23 | PQPQQTFPH  | 85  |
| 90 | PFPPQQQQQ  | 23 | LQPQQPYQPQ | 82  |
| 91 | HQPQQPYQPQ | 23 | HQPQQQFPQ  | 81  |
| 92 | QRPQQPFQPQ | 22 | PFPPQPQLPF | 80  |
| 93 | PQQQQQLPQ  | 22 | QQAQLPFPQ  | 78  |
| 94 | QQPQQPFPL  | 22 | QLPFPQQPQ  | 78  |

|     |           |    |           |    |
|-----|-----------|----|-----------|----|
| 95  | QQPQQPCPQ | 21 | QQPYPQQPY | 77 |
| 96  | PTPQQQFPQ | 21 | QFPGQQQPF | 77 |
| 97  | PFPQPQLPF | 20 | PQPQQPYSQ | 75 |
| 98  | PFSQPQLPY | 20 | PRPQLPYPQ | 74 |
| 99  | IQPQQQQPQ | 20 | QQSFPQQQQ | 71 |
| 100 | PQPQLLYPQ | 19 | QFPQQQQPL | 69 |
